# Supplementary material
Source: publisher figshare collection journal article supplement (https://gsajournals.figshare.com/ndownloader/files/14657201)
Supplement: Supplementary file 1 [file 14657201]

## Sheet: Sheet1
Table S2. Results from the discriminant factorial correspondence analysis for the microsatellite and fixed SNV markers. Bold clonal IDs indicate repetitive genotypes and grey rows highlight samples where the probability of membership from the discriminant factorial correspondence analysis differs between the two marker sets. For example, sample 1545 was identified as A. palmata based on morpholog…
Taxon	Region	Sample ID	Acropora Clonal ID	Reef	Collection Date	Predicted MLG group Msats	% Group Membership by Msats	Predicted MLG group SNVs	% Group Membership by SNVs
A. cervicornis	Bahamas	1770	C1023	LSI		A. cervicornis	95	A. cervicornis	88
	Belize	8870	C1594	Curlew	2012-09-13	A. cervicornis	80	A. cervicornis	88
		13829	C1643	Glovers Atoll	2015-11-08	A. cervicornis	96	A. cervicornis	88
	Curacao	2454	C1525	Curacao	2012-05-02	A. cervicornis	99	A. cervicornis	88
		13923	C1652	EastPoint2	2016-02-05	A. cervicornis	92	A. cervicornis	88
	Florida	9412	C1181	Thicket 3	2007-07-08	A. cervicornis	95	A. cervicornis	88
		9468	C1199	Lower Keys	2008-04-09	A. cervicornis	89	A. cervicornis	88
	USVI	2984	C1464	Cane Bay	2012-01-23	A. cervicornis	58	A. cervicornis	88
		13772	C1504	Thatch	2015-11-02	A. cervicornis	97	A. cervicornis	88
A. palmata	Bahamas	1545	P1067	Great Inagua	2002-09-16	Hybrid	66	A. palmata	100
		1617	P1089	Charlies Beach	2003-02-11	A. palmata	68	A. palmata	100
	Belize	5977	P2275	GSTF1		A. palmata	62	A. palmata	100
		8900	P2653	South Carrie Bow 2	2012-09-13	A. palmata	86	A. palmata	100
	Curacao	3141	P1250	Puntu Picu	2002-12-18	A. palmata	67	A. palmata	100
		13909	P2982	Sea Aquarium 2	2016-02-03	Hybrid	58	A. palmata	100
	Florida	1000	P1000	Horseshoe	2002-07-17	Hybrid	61	A. palmata	100
		5551	P2120	CF2	2006-06-02	Hybrid	54	A. palmata	100
	USVI	4067	P1423	Johnsons Reef	2002-09-23	A. palmata	100	A. palmata	100
		13722	P2949	Sapphire	2015-10-30	A. palmata	67	A. palmata	100
F1 Hybrid	Bahamas	1769	H3	LSI		Hybrid	55	Hybrid	74
	Belize	8939	H69	Glovers-G61	2012-09-13	Hybrid	70	Hybrid	74
	USVI	1834	H51	Coccolus Point	2010-06-04	Hybrid	81	Hybrid	74
Hybrid	Bahamas	1667	P1107	Bock Cay	2003-01-27	Hybrid	62	Hybrid	84
	Belize	13778	H105	South Carrie Bow Cay	2015-11-05	Hybrid	87	Hybrid	74
		6779	P2577	French Louie	2005-05-01	Hybrid	84	Hybrid	74
		6791	H11	Gladden	2005-05-01	Hybrid	84	Hybrid	92
		8867	C1585	Curlew	2012-09-13	A. cervicornis	99	Hybrid	83
		13807	H112	Sandbores2	2015-11-07	A. palmata	77	Hybrid	99
		11274	H77	Coral Gardens	2013-05-30	Hybrid	46	Hybrid	74
		11334	H81	Coral Gardens	2013-05-30	Hybrid	83	Hybrid	74
		11409	H83	Coral Gardens	2013-05-30	Hybrid	76	A. cervicornis	88
		5993	P2283	GSTF12		Hybrid	75	Hybrid	61
		13799	P2629	South Carrie Bow Cay	2015-11-06	Hybrid	61	Hybrid	74
		11293	P2659	Coral Gardens	2013-05-30	Hybrid	70	Hybrid	97
		11414	H79	Coral Gardens	2013-05-30	Hybrid	83	A. cervicornis	88
		11328	H80	Coral Gardens	2013-05-30	Hybrid	87	A. cervicornis	88
		11327	H82	Coral Gardens	2013-05-30	Hybrid	86	A. cervicornis	88
	Curacao	3070	P1208	Blue Bay	2002-12-16	Hybrid	87	Hybrid	96
		3071	P1209	Blue Bay	2002-12-16	Hybrid	56	Hybrid	99
	Florida	1302	H1	Dry Tortugas	2003-07-29	Hybrid	86	Hybrid	90
		1303	H2	Dry Tortugas	2003-07-29	Hybrid	84	Hybrid	100
	USVI	4062	P1419	Johnsons Reef	2002-09-23	Hybrid	79	Hybrid	98
		13708	H113	Botany2	2015-10-28	A. cervicornis	98	Hybrid	74
		1837	H14	Hans Lollik	2010-06-04	Hybrid	81	Hybrid	74
		1835	H34	Botany Bay	2010-06-04	Hybrid	84	Hybrid	92
		13764	H54	Flat Key 2	2015-10-31	Hybrid	71	A. cervicornis	59
Hybrid test set	Belize	14280	H97		2016-08-01	Hybrid	88	Hybrid	74
		14281	H120	Glovers-118	2016-08-01	Hybrid	73	Hybrid	74
		14282	H123		2016-08-01	Hybrid	82	Hybrid	74
		14322	H112	Sandbores	2016-08-01	A. palmata	77	Hybrid	74
		14323	H112	Sandbores	2016-08-01	A. palmata	77	Hybrid	74
		14324	H102	Sandbores	2016-08-01	Hybrid	62	Hybrid	74
		14325	H72	Glovers-121	2016-08-01	Hybrid	77	Hybrid	74
		14326	H117	Glovers-126	2016-08-01	Hybrid	81	Hybrid	74
		14327	H116	Glovers-124	2016-08-01	Hybrid	86	Hybrid	74
		14328	H72	Glovers-121	2016-08-01	Hybrid	77	Hybrid	74
		14329	H118	Glovers-124	2016-08-01	Hybrid	86	Hybrid	74
		14330	H119	Glovers-118	2016-08-01	Hybrid	64	Hybrid	74
		14331	H119	Glovers-118	2016-08-01	Hybrid	64	Hybrid	74
		14333	H115	Glovers-124	2016-08-01	Hybrid	47	Hybrid	74
		14334	H13	SCB	2016-08-01	Hybrid	87	Hybrid	74
		14335	H99	SCB	2016-08-01	A. cervicornis	97	Hybrid	74
		14336	H99	SCB	2016-08-01	A. cervicornis	97	Hybrid	74
		14337	H99	SCB	2016-08-01	A. cervicornis	97	Hybrid	74
		14338	H122	Glovers-118	2016-08-01	Hybrid	84	Hybrid	74
		14339	H99	SCB	2016-08-01	A. cervicornis	97	Hybrid	74
